# Supplementary material for: Understanding the degradation mechanism of rechargeable lithium/sulfur cells: a comprehensive study of the sulfur–graphene oxide cathode after discharge–charge cycling
Source: Royal Society of Chemistry journal article supplement (doi:10.1039/c4cp01341g), 2014-01-01
Supplement: c4cp01341g1.pdf [file c4cp01341g1.pdf]

## Supporting information

### **Understanding the degradation mechanism of rechargeable lithium/sulfur cells: a comprehensive study of the sulfur-graphene oxide cathode after discharge/charge cycling**

Xuefei Feng,<sup>‡a,b</sup> Min-Kyu Song,<sup>‡c,d</sup> Wayne C. Stolte,<sup>b,e</sup> David Gardenghi,<sup>b,e</sup> Duo Zhang,<sup>b,f</sup> Xuhui Sun,<sup>f</sup> Junfa Zhu,<sup>\*a</sup> Elton J. Cairns,<sup>\*d,g</sup> and Jinghua Guo<sup>\*b,h</sup>

a. National Synchrotron Radiation Laboratory & Collaborative Innovation Center of Suzhou Nano Science and Technology, University of Science and Technology of China, Hefei 230029, China.

b. Advanced Light Source, Lawrence Berkeley National Laboratory, Berkeley, CA 94720, USA.

c. The Molecular Foundry, Lawrence Berkeley National Laboratory, Berkeley, CA 94720, USA

d. Department of Chemical and Biomolecular Engineering, University of California, Berkeley, CA 94720, USA

e. Department of Chemistry, University of Nevada, Las Vegas, NV 89154-4003, USA

f. Institute of Functional Nano & Soft Materials (FUNSOM), Soochow University, Suzhou 215123, Jiangsu, China

g. Environmental Energy Technologies Division, Lawrence Berkeley National Laboratory, Berkeley, CA 94720, USA

h. Department of Chemical and Biochemistry, University of California, Santa Cruz, CA 95064, USA

#### **Corresponding Author**

jfzhu@ustc.edu.cn; ejcairns@lbl.gov; jguo@lbl.gov;

#### **Author Contributions**

‡These authors contributed equally.

**S1. S K-edge Comparison of elemental S ( $S_8$ ) and S-GO**

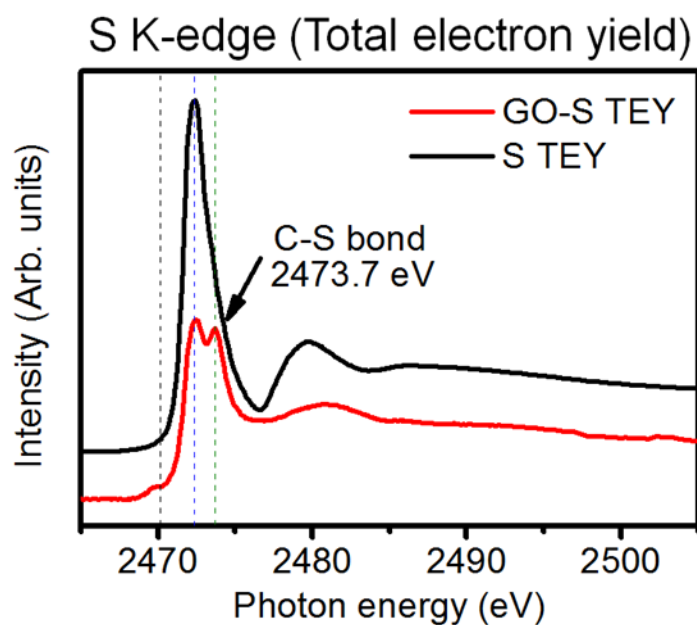

**Figure S1.** Total electron yield (TEY) S K-edge NEXAFS spectra of elemental S ( $S_8$ ) and S-GO.

**S2. S K-edge TEY spectra of pure LiTFSI**

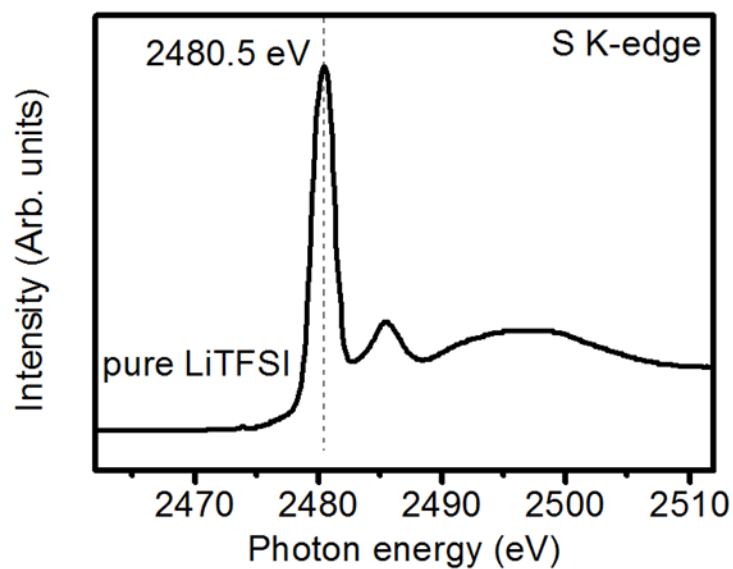

**Figure S2.** TEY NEXAFS spectra of S K-edge of pure LiTFSI.

### S3. O K-edge TEY spectra of the cathode materials before and after cycling

For the S-GO cathode materials with 0 cycle, several absorption features can be observed. The peak at 531.1 eV and 533.7 eV are assigned as the O 1s transition to carboxyl  $\pi^*$  and epoxide  $\pi^*$ , respectively.<sup>1,3</sup> It should be mentioned that the 533.7 eV peak can also be attributed the O 1s transition to the  $\pi^*$  orbital of C=O in  $\text{Li}_2\text{CO}_3$ .<sup>4</sup> The peak around 537.1 eV is due to the O 1s transition to S-O  $\sigma^*$ , while the feature at 539.4 eV should be the contribution of O 1s transition to C-O  $\sigma^*$ .<sup>1</sup> After cycling, the ratio of the peaks at 537.1 eV and 539.4 eV increases, implying the formation of possible lithium sulfite and lithium sulfate species on the cathode interface. The damping of the feature at 531.1 eV shows the strong interaction between Li atoms and carboxyl. In addition, the intensification of the 533.7 eV feature after 100 cycles proves the formation of  $\text{Li}_2\text{CO}_3$  on the S-GO cathode surface.

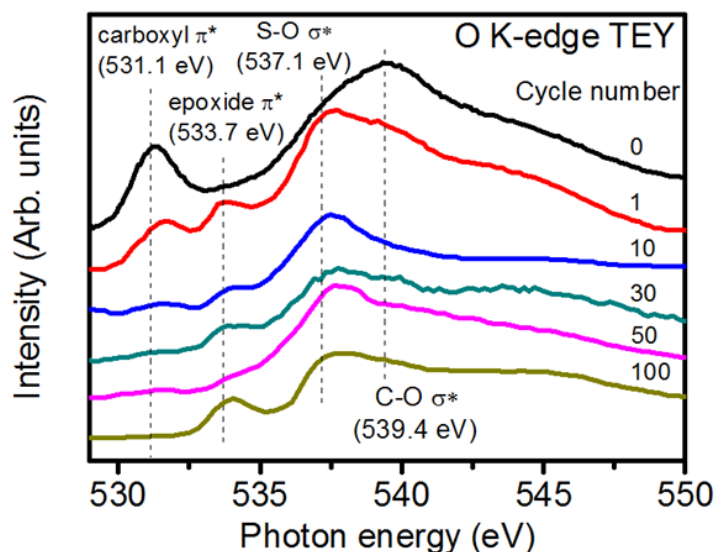

**Figure S3.** TEY NEXAFS of O K-edge of the S-GO cathode materials at different discharge/charge cycles. All electrodes were examined in the fully charged states.

### S4. TFY signals of S K-edge and C K-edge absorption spectra of S-GO cathode

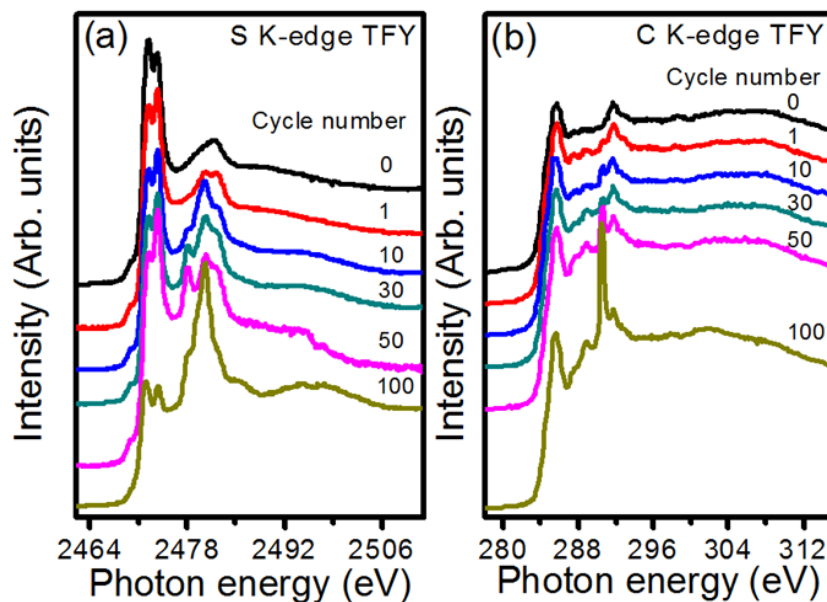

**Figure S4.** (a) S K-edge and (b) C K-edge absorption spectra of S-GO cathode materials measured with TFY mode.

### REFERENCES

- (1) Zhang, L.; Ji, L. W.; Glans, P. A.; Zhang, Y. G.; Zhu, J. F.; Guo, J. H. *PCCP* **2012**, *14*, 13670.
- (2) Rodriguez, J. A.; Dvorak, J.; Jirsak, T. *J. Phys. Chem. B* **2000**, *104*, 11515.
- (3) Jeong, H. K.; Noh, H. J.; Kim, J. Y.; Jin, M. H.; Park, C. Y.; Lee, Y. H. *EPL* **2008**, *82*.
- (4) Qiao, R. M.; Chuang, Y. D.; Yan, S. S.; Yang, W. L. *Plos One* **2012**, *7*.
